# Supplementary material for: Estimating radar precipitation in cold climates: the role of air temperature within a non-parametric framework
Source: Copernicus journal article supplement (doi:10.5194/hess-22-6533-2018), 2018-12-19
Supplement: Supplementary file 1 [file hess-22-6533-2018-supplement.pdf]

Supplement of Hydrol. Earth Syst. Sci., 22, 6533–6546, 2018  
<https://doi.org/10.5194/hess-22-6533-2018-supplement>  
© Author(s) 2018. This work is distributed under  
the Creative Commons Attribution 4.0 License.

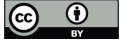

*Supplement of*

## **Estimating radar precipitation in cold climates: the role of air temperature within a non-parametric framework**

**Kuganesan Sivasubramaniam et al.**

*Correspondence to:* Kuganesan Sivasubramaniam ([kuganesan.sivasubramaniam@ntnu.no](mailto:kuganesan.sivasubramaniam@ntnu.no))

The copyright of individual parts of the supplement might differ from the CC BY 4.0 License.

Supplementary Material

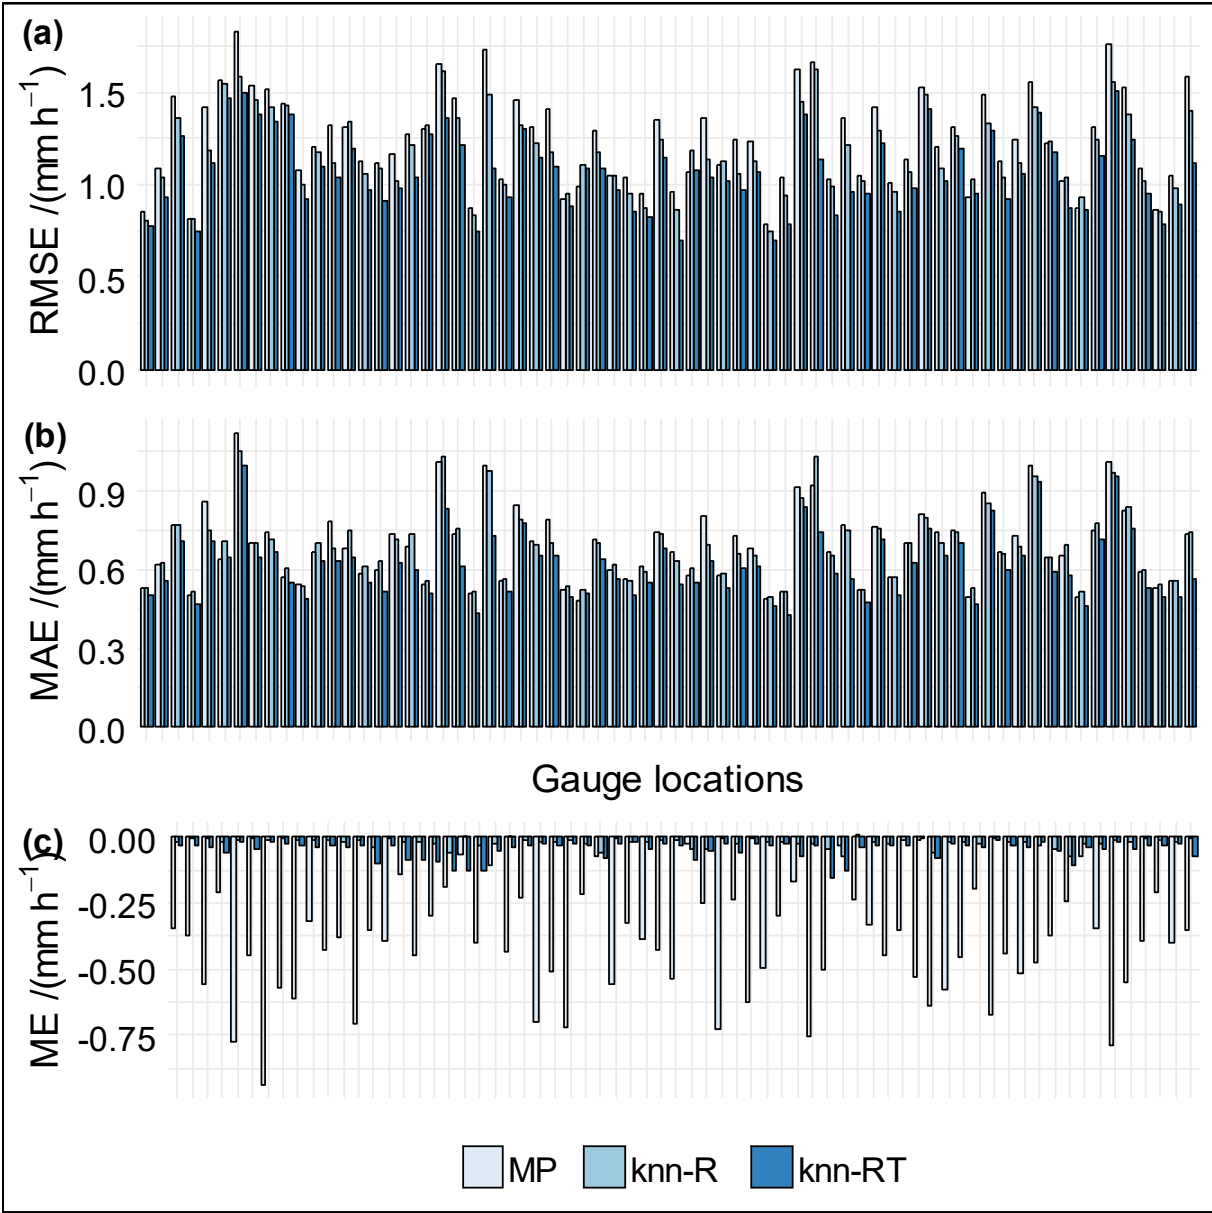

Figure S1. Bar plot representing three quality metrics (RMSE, MAE and ME) estimated at gauge locations for the original data (MP) and for the two nonparametric models (knn-R and knn-RT). Here, knn-R denotes the nonparametric model with radar precipitation rate as a single predictor, while knn-RT denotes the nonparametric model with radar precipitation rate and air temperature as two predictors with fixed partial weight of (0.68, 0.32).

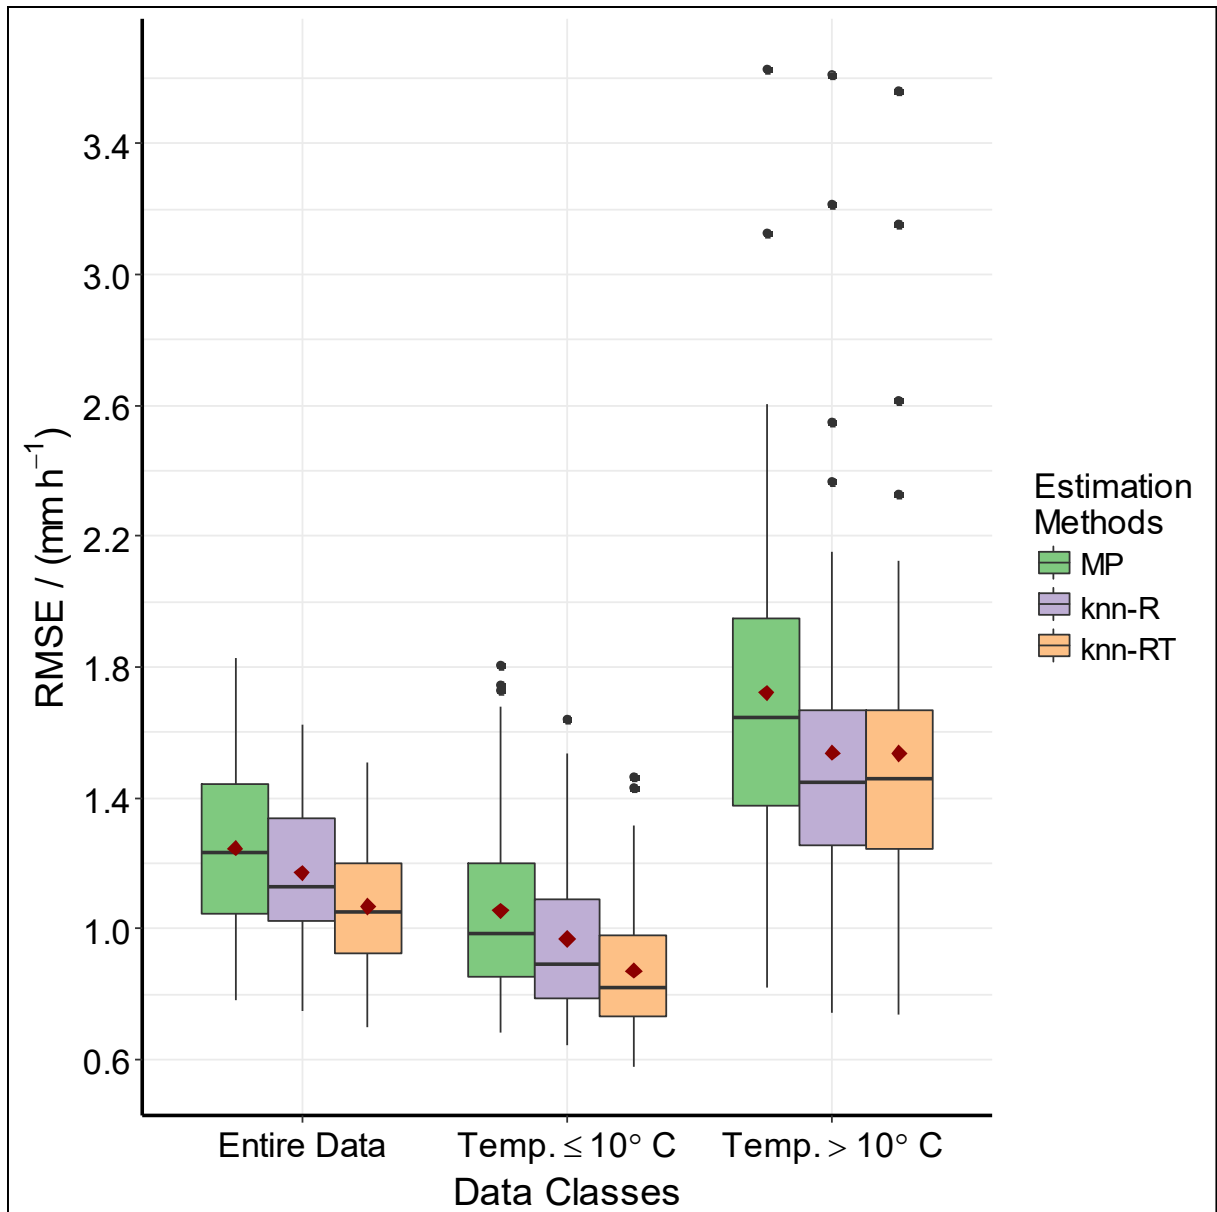

Figure S2. Box plot of RMSE ( $\text{mm h}^{-1}$ ) values estimated at gauge locations for the original data (MP) and the two nonparametric models (knn-R and knn-RT) using the entire data and the datasets with temperatures colder than or equal  $10^\circ \text{C}$  and warmer than  $10^\circ \text{C}$ . Mean value of RMSE for each model by red diamond point. Here, knn-R - nonparametric model with radar precipitation rate as single predictor and knn-RT - nonparametric model with radar precipitation rate and air temperature as two predictors with the partial weight of (0.68, 0.32). The values outside  $1.5 * \text{IQR}$  are represented by the whiskers.
